# Supplementary material
Source: ML conference proceedings conference paper supplement (https://openaccess.thecvf.com/content/CVPR2025/html/Yang_PIAD_Pose_and_CVPR_2025_paper.html)
Supplement: Supplementary file 2 [file Yang_PIAD_Pose_and_CVPR_2025_supplemental.pdf]

# PIAD: Pose and Illumination agnostic Anomaly Detection

## Supplementary Material

### 1. Gradient of the pose estimation loss to pose parameters in 3DGS

The gradient of the loss function  $\mathbf{L}$  to  $\mathbf{x}$  is used to refine the initial pose  $T^0$  as introduced in Subsection 3.3 of the main paper. It is defined as follows:

$$\frac{\partial \mathcal{L}}{\partial \mathbf{x}} = \left( \frac{\partial \mathcal{L}}{\partial I} \frac{\partial I}{\partial V} + \frac{\partial \mathcal{L}}{\partial R} \frac{\partial R}{\partial V} \right) \frac{\partial V}{\partial \mathbf{x}}. \quad (1)$$

The derivatives  $\frac{\partial \mathcal{L}}{\partial I}$ ,  $\frac{\partial \mathcal{L}}{\partial R}$ , and  $\frac{\partial V}{\partial \mathbf{x}}$  are relatively straightforward to compute and can be efficiently implemented using PyTorch’s autograd framework. Consequently, the primary challenge lies in the computation of  $\frac{\partial I}{\partial V}$  and  $\frac{\partial R}{\partial V}$ . Given that the rendering processes of  $I$  and  $R$  are analogous, we focus on  $I$  as a representative example to elucidate the procedure for clarity. The gradient calculation formula is as follows:

$$\frac{\partial I}{\partial V} = \frac{\partial I}{\partial \mu'} \frac{\partial \mu'}{\partial V} + \frac{\partial I}{\partial \Sigma'} \frac{\partial \Sigma'}{\partial V} = \left( \frac{\partial I}{\partial V} \right)_1 + \left( \frac{\partial I}{\partial V} \right)_2, \quad (2)$$

where the first and second parts represent the gradient backtracked through the 2D mean  $\mu'$  and covariance matrix  $\Sigma'$  of the 3D Gaussian. Next, we compute these two parts separately.

#### 1.1. Mean Component

3D Gaussians are projected to 2D Gaussians for rendering a 2D image with the following 2D mean  $\mu'$ :

$$\mu' = \begin{bmatrix} \mu_1 \\ \mu_2 \end{bmatrix} = \begin{bmatrix} \frac{x_{hom}}{w_{hom}} \\ \frac{y_{hom}}{w_{hom}} \end{bmatrix}, \quad (3)$$

where  $[x_{hom}, y_{hom}, z_{hom}, w_{hom}]^T = P\mu_c$ ,  $P$  is the perspective matrix and  $\mu_c = V\mu$ .

Let  $F_1 = PV$  represent the composition of the perspective and view transformations, we calculate:

$$\frac{\partial I}{\partial F_1} = \begin{bmatrix} \frac{1}{w_{hom}} \frac{\partial I}{\partial \mu_1} \\ \frac{1}{w_{hom}} \frac{\partial I}{\partial \mu_2} \\ 0 \\ -\lambda \end{bmatrix} \cdot \begin{bmatrix} x & y & z & 1 \end{bmatrix}. \quad (4)$$

$$\lambda = \frac{\mu_1}{w_{hom}} \frac{\partial I}{\partial \mu_1} + \frac{\mu_2}{w_{hom}} \frac{\partial I}{\partial \mu_2}, \quad (5)$$

where  $\frac{\partial I}{\partial \mu_1}$  and  $\frac{\partial I}{\partial \mu_2}$  can be computed with the CUDA kernels provided by the original 3DGS [1]. So, we compute the first term of  $\frac{\partial I}{\partial V}$  as:

$$\left( \frac{\partial I}{\partial V} \right)_1 = \sum_{i=1}^4 \alpha_i^T \cdot \beta_i, \quad (6)$$

where

$$\begin{cases} \alpha_i = [P_{i1}, P_{i2}, P_{i3}, P_{i4}], \\ \beta_i = \left[ \left( \frac{\partial I}{\partial F_1} \right)_{i1}, \left( \frac{\partial I}{\partial F_1} \right)_{i2}, \left( \frac{\partial I}{\partial F_1} \right)_{i3}, \left( \frac{\partial I}{\partial F_1} \right)_{i4} \right]. \end{cases}$$

#### 1.2. Covariance Component

The projected 2D covariance matrix  $\Sigma'$  can be represented as:

$$\Sigma' = JW\Sigma W^T J^T, \quad (7)$$

where  $W$  is the 3x3 part on the top left of the view matrix  $V$ .  $J$  is the Jacobian matrix of perspective transformation at  $\mu_c$ :

$$J = \begin{bmatrix} 1/\mu_{c,2} & 0 & -\mu_{c,0}/\mu_{c,2}^2 \\ 0 & 1/\mu_{c,2} & -\mu_{c,1}/\mu_{c,2}^2 \\ \mu_{c,0}/l & \mu_{c,1}/l & \mu_{c,2}/l \end{bmatrix}, \quad (8)$$

where  $l = \|(\mu_{c,0}, \mu_{c,1}, \mu_{c,2})^T\|$  [5].

According to Eq. 8, we obtain  $J$  in the camera space  $\mu_c$ . Let  $F_2 = JW$ , we compute the second term of  $\frac{\partial I}{\partial V}$  as:

$$\left( \frac{\partial I}{\partial V} \right)_2 = \begin{bmatrix} \frac{\partial I}{\partial \mu_c} \mu_c^T + \frac{\partial I}{\partial F_2} J & \frac{\partial I}{\partial \mu_c} \\ O & 0 \end{bmatrix}, \quad (9)$$

where  $\frac{\partial I}{\partial \mu_c}$  and  $\frac{\partial I}{\partial F_2}$  can be computed with the CUDA kernels provided by the 3DGS. Finally, we can optimize the camera pose of 3DGS. To improve efficiency, our adapted backpropagation module computes gradients for pose estimation, skipping those required for training standard 3D Gaussians.

## 2. Coarse estimation

Our coarse pose estimation module determines the initial camera pose  $T^{(0)}$  by integrating RGB similarity and local feature matching between the query reflectance image  $R_{query}$  and training set  $\{R_i\}_{i=1}^N$ . The pipeline operates through two key stages:

$$\mathcal{T}' = \mathcal{F}(\mathcal{T}, R_{query}) = \{(R_i, T_i) \mid i \in \mathcal{J}\}, \quad (10)$$

where  $\mathcal{J}$  contains indices of the top 50% training samples with minimal MAE scores:

$$s_i = \|R_i - R_{query}\|_1. \quad (11)$$

The feature matching stage then identifies the optimal candidate using EfficientLoFTR’s coarse-level matching [2]:

$$R^0 = \mathcal{M}(\mathcal{T}', R_{query}). \quad (12)$$

The initial pose  $T^{(0)}$  is directly inherited from  $R^0$ , leveraging the argument that visually similar reflectance images share proximate camera poses.

## 3. More Results

### 3.1. Quantitative Results

**Quantitative comparisons on synthetic datasets – Tables 1 and 2.** The quantitative comparison of the baseline methods and our proposed approach on each object of MAD-Sim [4] and our synthetic dataset are presented in Tables 1 and 2, respectively. Compared to Table 3 in the main paper, these comparisons offer more detailed insights. The experiments demonstrate that our method achieves significantly better performance than the baselines regarding pixel and image-level AUROC.

**Quantitative results on real dataset – Table 3.** The detailed performance of the baselines and our method on our real dataset are reported in Table 4 of the main paper and are reproduced in Table 3 here for convenience. The comparisons show that our method significantly outperforms the other two methods in pixel-level and image-level AUROC.

### 3.2. Qualitative Results - Figures 1 to 3

We provide qualitative comparisons for all objects in our real dataset in Figures 1 to 3, as a supplement to Figure 6 in the main paper. For each object, one randomly selected defect type is showcased. For the three objects featured in Figure 6 of the main paper (Filter, Wheel, and Valve), we vary the camera pose, defect size, and defect type to provide a broader comparison. Our method accurately detects anomalies even when the lighting conditions of the query images differ from those of the training images.

| Objects    | Pixels AUROC↑ |           |       | Images AUROC↑ |           |       |
|------------|---------------|-----------|-------|---------------|-----------|-------|
|            | OmniAD        | SplatPose | Our   | OmniAD        | SplatPose | Our   |
| Gorilla    | 99.5          | 99.5      | 99.8  | 93.6          | 91.1      | 97.4  |
| Unicorn    | 98.2          | 99.7      | 99.7  | 94.0          | 98.8      | 99.4  |
| Mallard    | 97.4          | 99.7      | 99.8  | 94.7          | 97.7      | 99.3  |
| Turtle     | 99.1          | 99.5      | 99.4  | 95.6          | 97.1      | 96.8  |
| Whale      | 98.3          | 99.5      | 99.6  | 92.5          | 97.9      | 99.9  |
| Bird       | 95.7          | 99.5      | 99.4  | 92.4          | 92.9      | 98.0  |
| Owl        | 99.4          | 99.2      | 99.6  | 88.2          | 88.0      | 93.9  |
| Sabertooth | 98.5          | 99.4      | 99.3  | 95.7          | 96.6      | 98.6  |
| Swan       | 98.8          | 99.3      | 99.4  | 86.5          | 93.7      | 97.7  |
| Sheep      | 97.7          | 99.6      | 99.4  | 90.1          | 96.5      | 98.5  |
| Pig        | 97.7          | 99.8      | 99.8  | 88.3          | 96.7      | 99.0  |
| Zalika     | 99.1          | 89.5      | 99.5  | 88.2          | 99.3      | 94.2  |
| Phoenix    | 99.4          | 99.5      | 99.7  | 82.3          | 84.6      | 94.0  |
| Elephant   | 99.0          | 99.7      | 99.6  | 92.5          | 95.3      | 99.3  |
| Parrot     | 99.5          | 99.5      | 99.5  | 97.0          | 93.6      | 99.8  |
| Cat        | 97.7          | 99.6      | 99.5  | 84.9          | 86.1      | 93.1  |
| Scorpion   | 95.9          | 99.4      | 99.2  | 91.5          | 99.3      | 99.7  |
| Obesobeso  | 98.0          | 99.5      | 98.9  | 97.1          | 96.1      | 91.9  |
| Bear       | 99.3          | 99.6      | 99.5  | 98.8          | 98.9      | 99.8  |
| Puppy      | 98.8          | 99.1      | 99.4  | 93.5          | 97.1      | 97.8  |
| MEAN       | 98.35         | 99.01     | 99.50 | 91.87         | 94.87     | 97.41 |

Table 1. **Anomaly detection; MAD-Sim dataset** – Comparisons of pixel and image-level AUROC. The best results are color-coded.

| Objects   | Pixels AUROC↑ |           |       | Images AUROC↑ |           |       |
|-----------|---------------|-----------|-------|---------------|-----------|-------|
|           | OmniAD        | SplatPose | Our   | OmniAD        | SplatPose | Our   |
| Axletree  | 98.1          | 98.1      | 99.5  | 77.0          | 77.3      | 95.3  |
| Box       | 98.1          | 95.8      | 99.3  | 78.6          | 86.8      | 95.9  |
| Can       | 99.0          | 97.8      | 99.4  | 99.1          | 95.5      | 99.9  |
| Chain     | 98.9          | 97.5      | 99.1  | 95.6          | 98.4      | 100.0 |
| Gear      | 95.8          | 95.6      | 97.1  | 98.1          | 88.6      | 99.7  |
| Keyring   | 99.3          | 98.8      | 99.5  | 98.4          | 100.0     | 100.0 |
| Motor     | 99.4          | 95.7      | 99.0  | 81.5          | 77.6      | 98.4  |
| Parts     | -             | 95.2      | 99.5  | -             | 54.1      | 99.4  |
| Picker    | 98.0          | 98.7      | 99.4  | 96.2          | 93.3      | 99.4  |
| Section   | -             | 96.2      | 99.2  | -             | 82.6      | 99.5  |
| Shaft     | 99.2          | 98.7      | 99.6  | 99.1          | 92.4      | 100.0 |
| Spray.can | 98.8          | 98.9      | 99.3  | 63.1          | 92.7      | 100.0 |
| Spring    | 99.6          | 99.3      | 99.5  | 86.7          | 82.4      | 92.4  |
| Sprockets | 98.9          | 98.7      | 99.6  | 97.8          | 96.4      | 99.2  |
| Amphora   | 85.2          | 96.9      | 97.5  | 57.6          | 76.3      | 79.5  |
| Teapot    | 88.7          | 96.4      | 97.6  | 59.4          | 79.5      | 87.8  |
| MEAN      | 96.93         | 97.39     | 99.01 | 84.87         | 85.87     | 96.65 |

Table 2. **Anomaly detection; our dataset (synt)** – Comparisons of pixel and image-level AUROC. The best results are color-coded.

## 4. Ablation Studies

As claimed in lines 401-403 of the main paper, we provide the ablation study results on our complete synthetic and real datasets in Tables 4 to 6. *CL* denotes the data with consistent lighting, and *IL* refers to the data with inconsistent lighting (marked with a gray background).

**Pose initialization and optimization – Table 4.** Our method utilizes reflectance images for pose initialization and combines them with color images for pose estimation. To validate the effectiveness of this strategy, we evaluate various configurations. We denote the use of color (*I*)

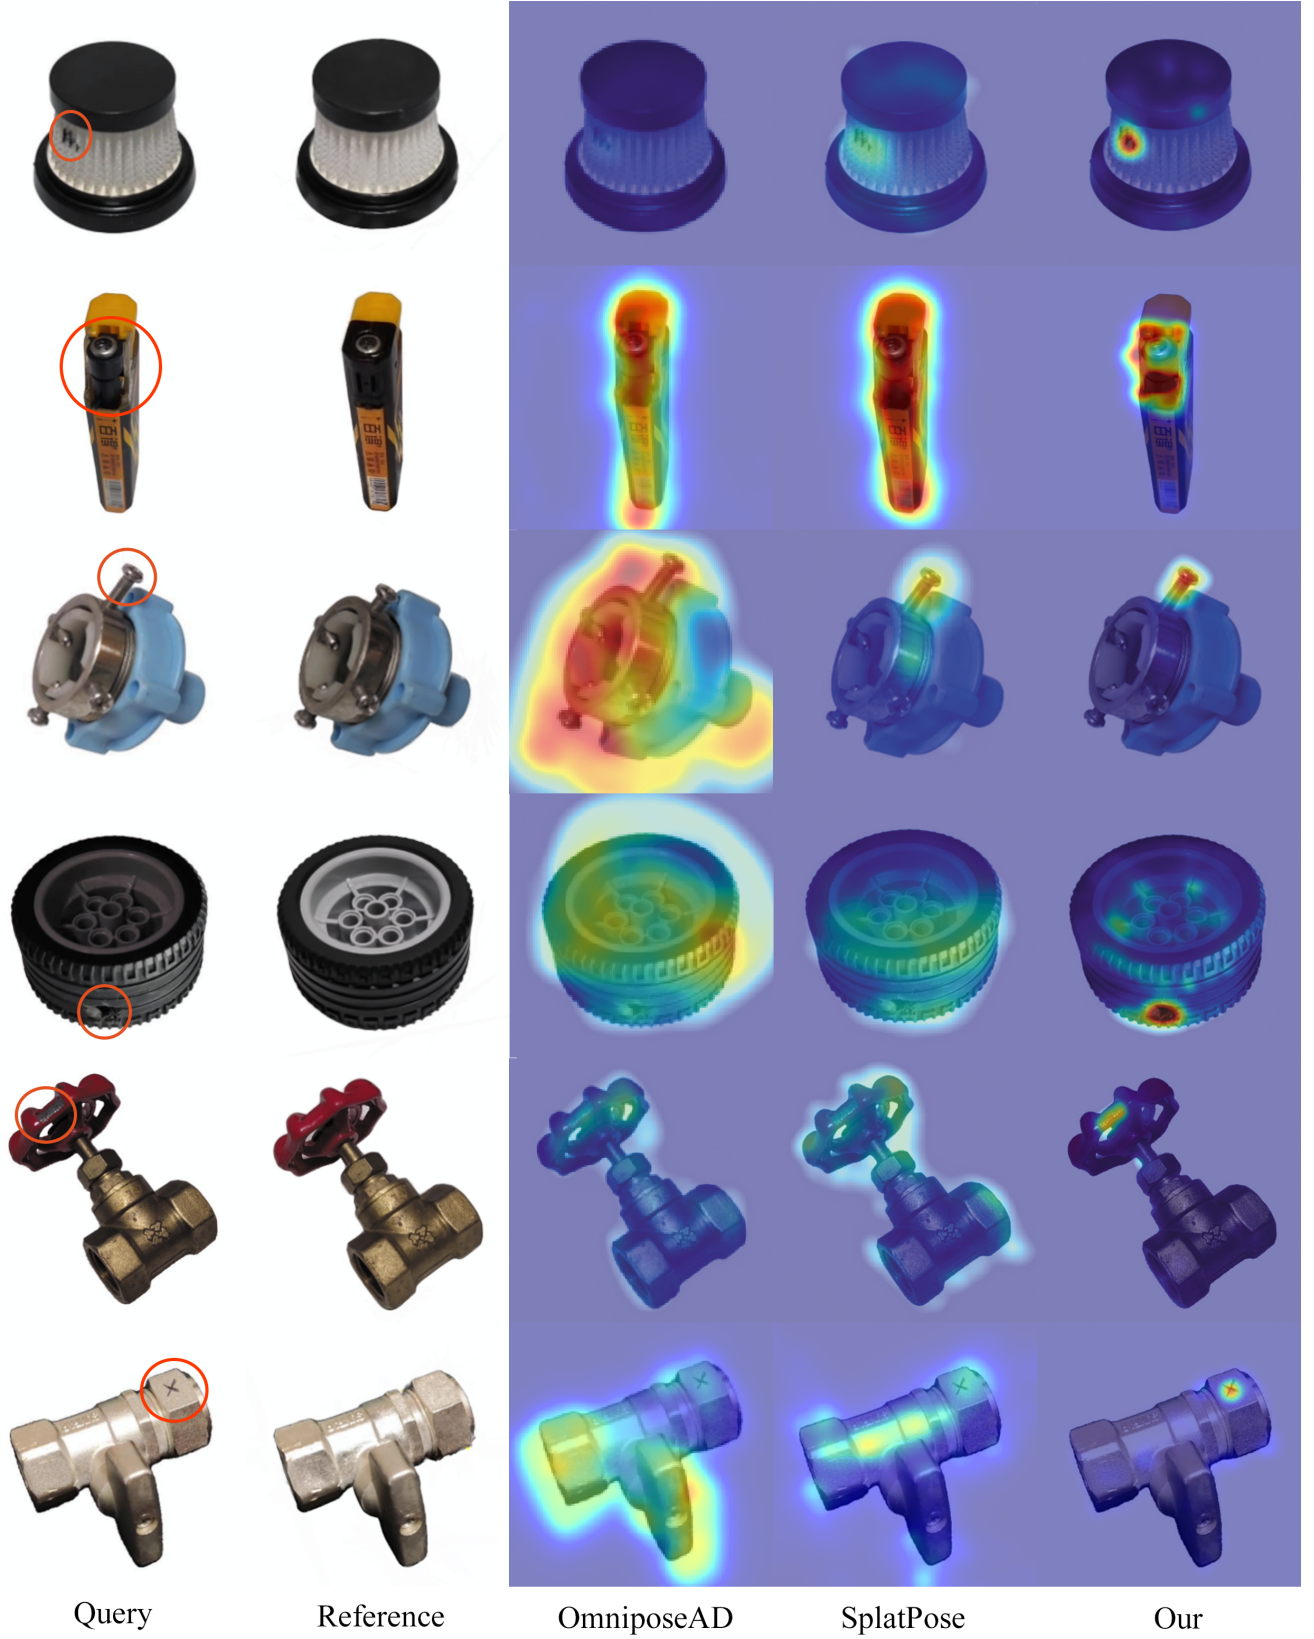

Figure 1. **Qualitative comparisons on anomaly detection (Part 1 of 3).** In the left two columns, we visualize the query images and reference images. The right three columns compare the heatmaps generated by our method and the baselines.

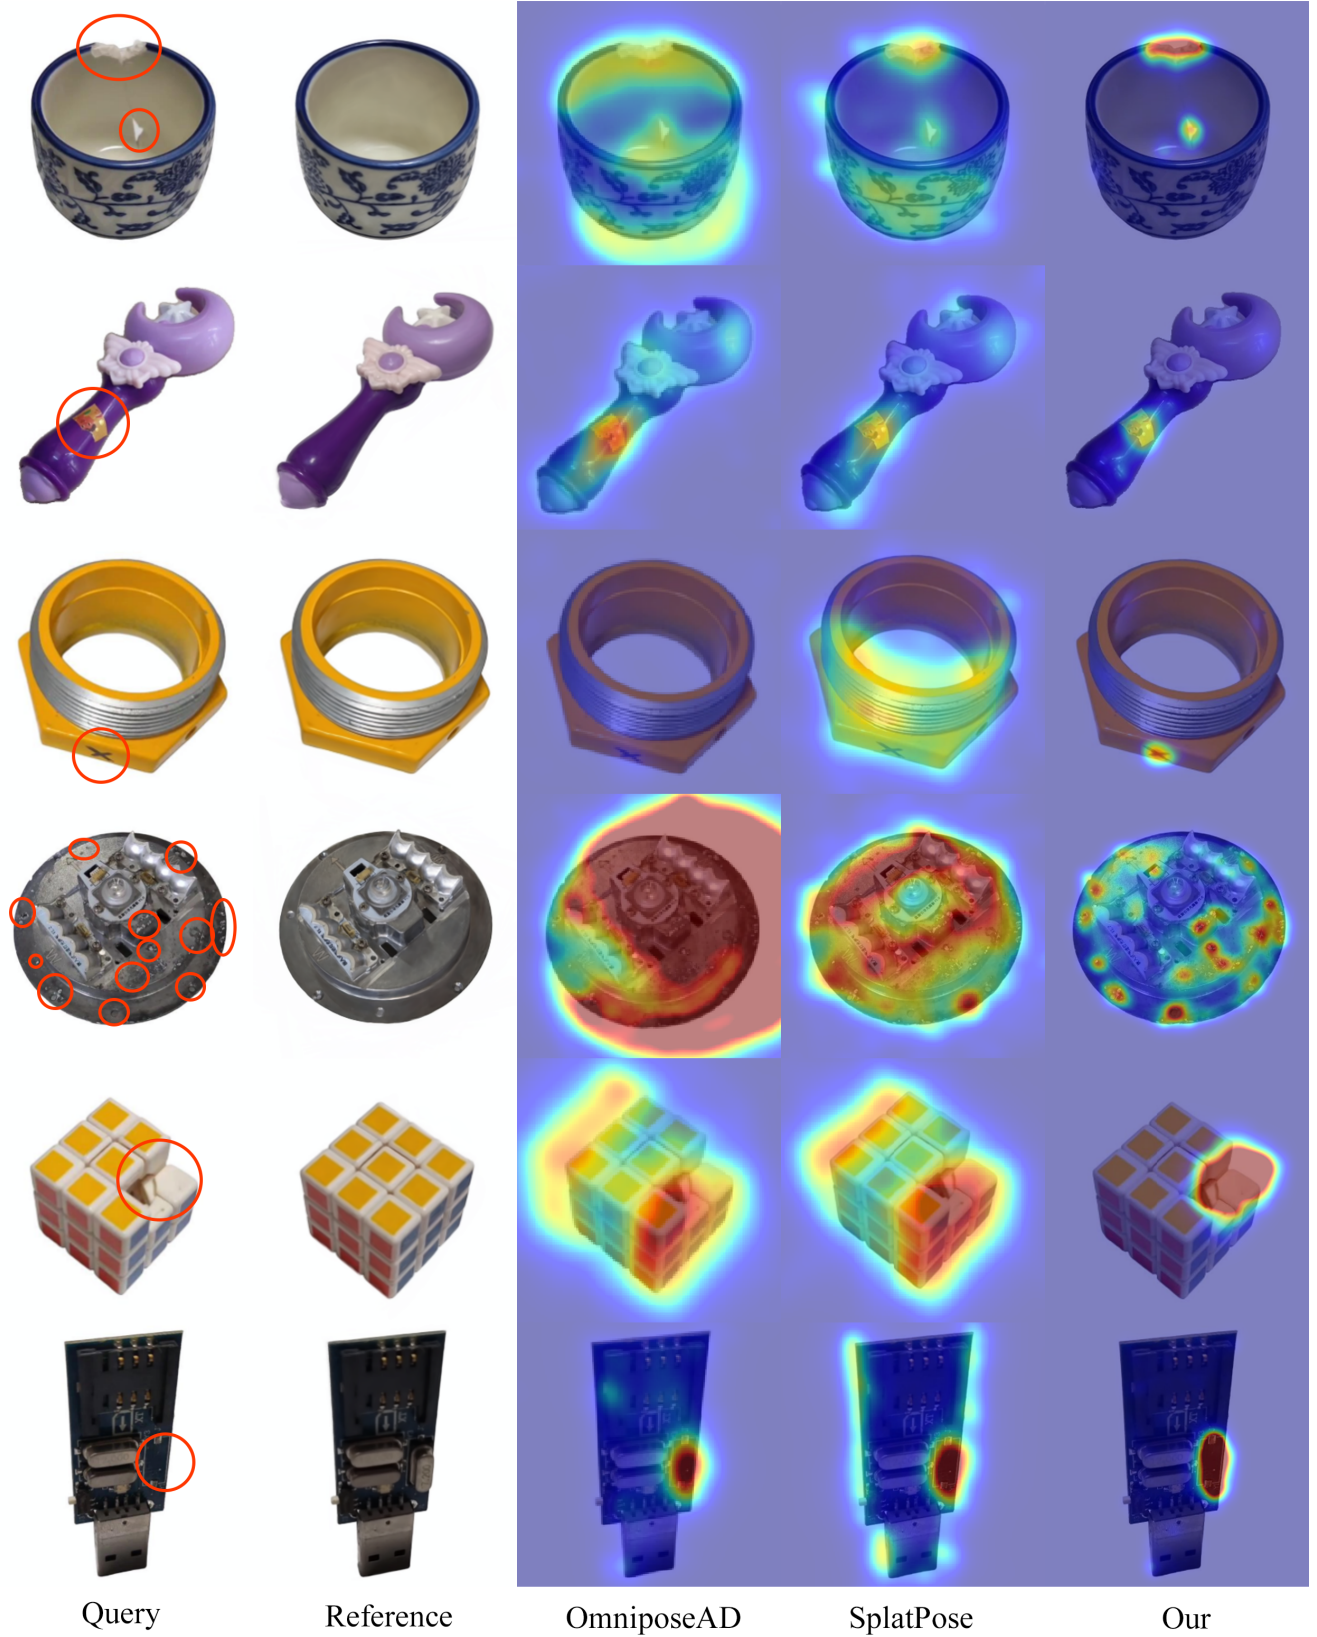

Figure 2. **Qualitative comparisons on anomaly detection (Part 2 of 3).** In the left two columns, we visualize the query images and reference images. The right three columns compare the heatmaps generated by our method and the baselines.

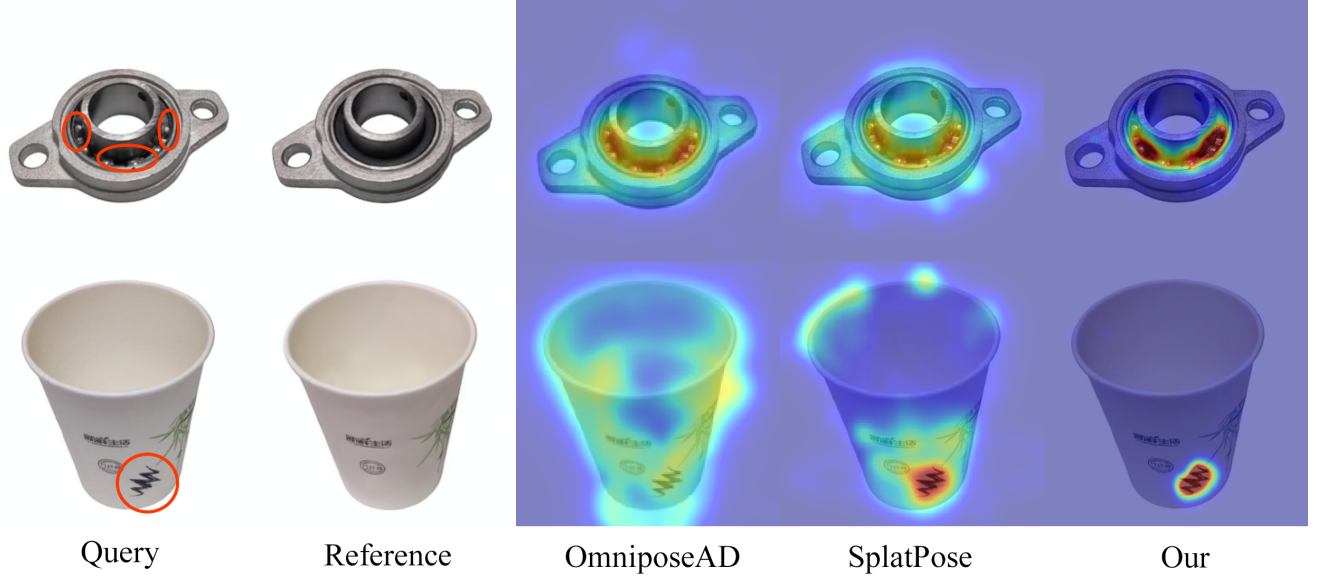

Figure 3. **Qualitative comparisons on anomaly detection (Part 3 of 3).** In the left two columns, we visualize the query images and reference images. The right three columns compare the heatmaps generated by our method and the baselines.

| Objects  | Pixels AUROC↑ |           |       | Images AUROC↑ |           |       |
|----------|---------------|-----------|-------|---------------|-----------|-------|
|          | OmnAD         | SplatPose | Our   | OmnAD         | SplatPose | Our   |
| Valve    | 97.3          | 92.9      | 99.3  | 91.7          | 74.1      | 98.8  |
| Tube     | 97.2          | 99.5      | 99.6  | 95.7          | 81.5      | 94.7  |
| Cup      | 92.5          | 98.8      | 99.5  | 63.6          | 83.1      | 92.5  |
| USB      | 96.1          | 99.1      | 99.4  | 51.8          | 41.9      | 55.8  |
| Joint    | 94.0          | 99.6      | 99.7  | 57.6          | 100.0     | 100.0 |
| PaperCup | 91.5          | 98.7      | 99.1  | 62.1          | 71.4      | 91.1  |
| Lighter  | 98.5          | 99.5      | 99.8  | 88.0          | 90.9      | 99.9  |
| Cube     | 97.3          | 99.0      | 99.3  | 89.7          | 93.5      | 87.7  |
| Lamp     | 85.5          | 94.6      | 95.8  | 95.6          | 73.8      | 95.4  |
| Bolt     | 95.6          | 98.0      | 98.9  | 90.3          | 83.5      | 99.1  |
| Filter   | 96.6          | 99.7      | 99.9  | 78.7          | 81.9      | 97.0  |
| Wand     | 92.7          | 98.1      | 99.6  | 39.1          | 76.0      | 94.4  |
| Wheel    | 95.6          | 96.5      | 97.1  | 48.1          | 77.3      | 94.8  |
| Bearing  | 97.6          | 98.1      | 99.7  | 90.8          | 88.5      | 95.6  |
| MEAN     | 94.86         | 98.01     | 99.05 | 73.20         | 79.82     | 92.63 |

Table 3. **Anomaly detection; our dataset (real)** – Comparisons of pixel and image-level AUROC. The best results are color-coded.

and reflectance ( $R$ ) images in a module. As shown in Table 4, the selected configuration ( $R+IR$ ) performs best, especially for data with inconsistent lighting. While there is a slight drop in pixel-level AUROC for lighting-consistent data compared to using only color images ( $I+I$ ), this is expected. The quality of the rendered reflectance image is limited by the pre-trained RetinexNet [3], which has not been fine-tuned on our dataset. Moreover, the rendered color reference image remains accurate under consistent lighting conditions.

**Weights of pose optimization loss – Table 5.** We analyze the impact of  $\lambda$  in the pose optimization loss in Table 5. A

weight of 0.6 was chosen to achieve the best performance overall. This reveals that the high-frequency gradients of the color channel are still beneficial for fine-grained registration.

**Loss components for anomaly detection – Table 6.** We conducted three ablation experiments on different combinations of color and reflectance features for anomaly detection, as shown in Table 6. The results demonstrate that the color or reflectance feature alone may be more accurate at detecting differences at a pixel level, while their combination offers better detection performance and yields the best results overall.

## References

- [1] Bernhard Kerbl, Georgios Kopanas, Thomas Leimkühler, and George Drettakis. 3d gaussian splatting for real-time radiance field rendering. *ACM Transactions on Graphics (ToG)*, 42(4): 1–14, 2023. 1
- [2] Yifan Wang, Xingyi He, Sida Peng, Dongli Tan, and Xiaowei Zhou. Efficient lofr: Semi-dense local feature matching with sparse-like speed. In *CVPR*, pages 21666–21675, 2024. 2
- [3] Wenhui Wu, Jian Weng, Pingping Zhang, Xu Wang, Wenhao Yang, and Jianmin Jiang. Uretinex-net: Retinex-based deep unfolding network for low-light image enhancement. In *CVPR*, pages 5901–5910, 2022. 5
- [4] Qiang Zhou, Weize Li, Lihan Jiang, Guoliang Wang, Guyue Zhou, Shanghang Zhang, and Hao Zhao. Pad: A dataset and benchmark for pose-agnostic anomaly detection. In *NeurIPS*, pages 44558–44571. Curran Associates, Inc., 2023. 2
- [5] Matthias Zwicker, Hanspeter Pfister, Jeroen Van Baar, and

| Class             | Objects   | Pixels AUROC↑ |       |       |       | Images AUROC↑ |       |       |       |
|-------------------|-----------|---------------|-------|-------|-------|---------------|-------|-------|-------|
|                   |           | I+I           | I+IR  | R+R   | R+IR  | I+I           | I+IR  | R+R   | R+IR  |
| Real              | Valve     | 99.8          | 99.7  | 94.5  | 99.3  | 97.3          | 95.1  | 98.8  | 98.8  |
|                   | Tube      | 99.6          | 99.6  | 98.9  | 99.6  | 95.8          | 92.4  | 89.4  | 94.7  |
|                   | Cup       | 99.2          | 99.4  | 96.8  | 99.5  | 95.5          | 95.3  | 62.0  | 92.5  |
|                   | USB       | 99.4          | 99.4  | 94.9  | 99.4  | 52.2          | 52.4  | 52.0  | 55.8  |
|                   | Joint     | 99.6          | 99.7  | 99.7  | 99.7  | 100.0         | 100.0 | 99.9  | 100.0 |
|                   | PaperCup  | 99.3          | 99.6  | 99.1  | 99.1  | 85.9          | 99.0  | 86.6  | 91.1  |
|                   | Lighter   | 99.8          | 99.7  | 99.2  | 99.8  | 98.6          | 100.0 | 100.0 | 99.9  |
|                   | Cube      | 99.9          | 99.1  | 98.0  | 99.3  | 100.0         | 95.2  | 69.5  | 87.7  |
|                   | Lamp      | 97.4          | 97.4  | 93.7  | 95.8  | 100.0         | 100.0 | 91.6  | 95.4  |
|                   | Bolt      | 99.7          | 98.6  | 98.0  | 98.9  | 92.8          | 92.0  | 99.1  | 99.1  |
|                   | Filter    | 99.9          | 99.9  | 98.4  | 99.9  | 97.7          | 97.7  | 77.1  | 97.0  |
|                   | Wand      | 99.5          | 99.3  | 99.4  | 99.6  | 93.1          | 89.2  | 92.4  | 94.4  |
|                   | Wheel     | 97.1          | 96.7  | 89.3  | 97.1  | 92.5          | 92.3  | 59.3  | 94.8  |
|                   | Bearing   | 99.6          | 99.6  | 92.5  | 99.7  | 91.7          | 91.7  | 49.7  | 95.6  |
| Synt              | Axletree  | 96.4          | 96.3  | 93.0  | 99.5  | 77.8          | 69.4  | 61.8  | 95.3  |
|                   | Box       | 99.1          | 99.1  | 99.2  | 99.3  | 90.0          | 89.9  | 92.8  | 95.9  |
|                   | Can       | 99.5          | 99.5  | 99.2  | 99.4  | 99.9          | 99.9  | 100.0 | 99.9  |
|                   | Chain     | 99.2          | 99.2  | 98.9  | 99.1  | 100.0         | 100.0 | 100.0 | 100.0 |
|                   | Gear      | 97.3          | 97.3  | 97.0  | 97.1  | 97.7          | 99.7  | 99.7  | 99.7  |
|                   | Keyring   | 99.5          | 99.5  | 99.5  | 99.5  | 100.0         | 100.0 | 100.0 | 100.0 |
|                   | Motor     | 99.1          | 99.0  | 98.9  | 99.0  | 98.3          | 98.4  | 98.5  | 98.4  |
|                   | Parts     | 99.6          | 99.6  | 99.4  | 99.5  | 99.4          | 99.4  | 99.4  | 99.4  |
|                   | Picker    | 99.4          | 99.4  | 99.4  | 99.4  | 99.4          | 99.4  | 99.4  | 99.4  |
|                   | Section   | 99.2          | 99.2  | 99.2  | 99.2  | 99.5          | 99.5  | 99.4  | 99.5  |
|                   | Shaft     | 99.7          | 99.7  | 99.4  | 99.6  | 100.0         | 100.0 | 100.0 | 100.0 |
|                   | Spray_can | 99.3          | 99.3  | 99.3  | 99.3  | 100.0         | 100.0 | 100.0 | 100.0 |
|                   | Spring    | 99.6          | 99.6  | 99.6  | 99.5  | 92.2          | 92.4  | 92.6  | 92.4  |
|                   | Sprockets | 99.6          | 99.6  | 99.5  | 99.6  | 99.2          | 99.2  | 99.2  | 99.2  |
|                   | Amphora   | 96.4          | 97.4  | 97.5  | 97.5  | 81.5          | 89.4  | 84.2  | 79.5  |
|                   | Teapot    | 95.6          | 95.8  | 97.5  | 97.6  | 82.4          | 83.5  | 83.9  | 87.8  |
| MEAN of <i>CL</i> |           | 99.18         | 99.10 | 98.10 | 99.14 | 94.65         | 94.53 | 91.32 | 95.59 |
| MEAN of <i>IL</i> |           | 98.02         | 98.12 | 95.77 | 98.57 | 89.82         | 90.63 | 74.43 | 91.52 |
| MEAN of All       |           | 98.94         | 98.91 | 97.63 | 99.03 | 93.68         | 93.75 | 87.94 | 94.77 |

Table 4. **Ablation** – on pose initialization and optimization. The selected configuration (R+IR) performs best overall. We denote the use of color (*I*) and reflectance (*R*) images in a module.

Markus Gross. Ewa splatting. *IEEE Transactions on Visualization and Computer Graphics*, 8(3):223–238, 2002. 1

| Class      | Objects   | Pixels AUROC↑ |       |       |       |       | Images AUROC↑ |       |       |       |       |
|------------|-----------|---------------|-------|-------|-------|-------|---------------|-------|-------|-------|-------|
|            |           | 0.0           | 0.3   | 0.6   | 0.9   | 1.0   | 0.0           | 0.3   | 0.6   | 0.9   | 1.0   |
| Real       | Valve     | 98.9          | 98.9  | 99.3  | 95.3  | 94.6  | 99.0          | 98.9  | 98.8  | 97.5  | 96.5  |
|            | Tube      | 99.6          | 99.6  | 99.6  | 99.2  | 98.9  | 95.7          | 95.6  | 94.7  | 90.2  | 89.4  |
|            | Cup       | 99.4          | 99.3  | 99.5  | 98.8  | 96.8  | 92.1          | 92.2  | 92.5  | 78.1  | 64.4  |
|            | USB       | 99.6          | 99.6  | 99.4  | 98.6  | 95.0  | 57.9          | 56.7  | 55.8  | 56.4  | 52.7  |
|            | Joint     | 99.6          | 99.6  | 99.7  | 99.7  | 99.7  | 94.1          | 94.1  | 100.0 | 99.9  | 99.9  |
|            | PaperCup  | 98.8          | 98.9  | 99.1  | 99.1  | 99.1  | 82.9          | 83.3  | 91.1  | 95.5  | 84.8  |
|            | Lighter   | 99.8          | 99.8  | 99.8  | 99.5  | 99.1  | 97.3          | 98.4  | 99.9  | 100.0 | 100.0 |
|            | Cube      | 99.9          | 99.8  | 99.3  | 98.5  | 98.0  | 100.0         | 97.6  | 87.7  | 82.6  | 69.8  |
|            | Lamp      | 95.9          | 96.3  | 95.8  | 96.5  | 93.4  | 100.0         | 100.0 | 95.4  | 95.0  | 91.6  |
|            | Bolt      | 99.6          | 99.8  | 98.9  | 98.3  | 97.8  | 98.4          | 99.1  | 99.1  | 98.9  | 99.0  |
|            | Filter    | 99.9          | 99.9  | 99.9  | 99.8  | 98.6  | 97.6          | 97.5  | 97.0  | 96.8  | 75.9  |
|            | Wand      | 99.6          | 99.6  | 99.6  | 99.5  | 99.4  | 94.5          | 94.4  | 94.4  | 93.7  | 92.3  |
|            | Wheel     | 97.5          | 97.5  | 97.1  | 95.2  | 90.2  | 94.9          | 94.5  | 94.8  | 88.1  | 58.6  |
|            | Bearing   | 99.7          | 99.7  | 99.7  | 97.2  | 92.7  | 95.6          | 95.5  | 95.6  | 73.7  | 46.2  |
| Synt       | Axletree  | 96.4          | 96.4  | 99.5  | 95.0  | 93.1  | 77.7          | 75.3  | 95.3  | 61.7  | 57.0  |
|            | Box       | 99.3          | 99.3  | 99.3  | 99.3  | 99.2  | 96.1          | 95.7  | 95.9  | 92.7  | 92.6  |
|            | Can       | 99.4          | 99.4  | 99.4  | 99.4  | 99.2  | 99.9          | 99.9  | 99.9  | 99.9  | 100.0 |
|            | Chain     | 99.1          | 99.2  | 99.1  | 99.0  | 98.9  | 100.0         | 100.0 | 100.0 | 100.0 | 100.0 |
|            | Gear      | 97.1          | 97.1  | 97.1  | 97.0  | 97.0  | 99.7          | 99.7  | 99.7  | 99.7  | 99.7  |
|            | Keyring   | 99.5          | 99.5  | 99.5  | 99.5  | 99.5  | 100.0         | 100.0 | 100.0 | 100.0 | 100.0 |
|            | Motor     | 99.1          | 99.1  | 99.0  | 99.0  | 98.9  | 98.3          | 98.3  | 98.4  | 98.4  | 98.5  |
|            | Parts     | 99.5          | 99.5  | 99.5  | 99.5  | 99.3  | 99.4          | 99.4  | 99.4  | 99.4  | 99.4  |
|            | Picker    | 99.5          | 99.4  | 99.4  | 99.4  | 99.4  | 99.4          | 99.4  | 99.4  | 99.4  | 99.4  |
|            | Section   | 99.2          | 99.2  | 99.2  | 99.2  | 99.1  | 99.5          | 99.5  | 99.5  | 99.5  | 99.4  |
|            | Shaft     | 99.6          | 99.6  | 99.6  | 99.6  | 99.4  | 100.0         | 100.0 | 100.0 | 100.0 | 100.0 |
|            | Spray_can | 99.3          | 99.3  | 99.3  | 99.3  | 99.3  | 100.0         | 100.0 | 100.0 | 100.0 | 100.0 |
|            | Spring    | 99.6          | 99.6  | 99.5  | 99.5  | 99.6  | 92.2          | 92.3  | 92.4  | 92.6  | 92.6  |
|            | Sprockets | 99.6          | 99.6  | 99.6  | 99.6  | 99.4  | 99.2          | 99.2  | 99.2  | 99.2  | 99.2  |
|            | Amphora   | 97.2          | 97.4  | 97.5  | 97.6  | 97.7  | 76.8          | 76.1  | 79.5  | 83.4  | 85.1  |
|            | Teapot    | 97.2          | 97.6  | 97.6  | 97.4  | 97.6  | 82.1          | 84.7  | 87.8  | 80.7  | 84.3  |
| MEAN of CL |           | 99.05         | 99.08 | 99.14 | 98.66 | 98.07 | 94.95         | 94.78 | 95.59 | 93.19 | 91.08 |
| MEAN of IL |           | 98.52         | 98.62 | 98.57 | 97.78 | 96.03 | 90.25         | 90.45 | 91.52 | 86.07 | 73.73 |
| MEAN       |           | 98.95         | 98.98 | 99.03 | 98.48 | 97.66 | 94.01         | 93.91 | 94.77 | 91.77 | 87.61 |

Table 5. **Ablation** – balance between color and reflectance losses. A weight of 0.6 was chosen to achieve the best performance overall.

| Class        | Objects   | Pixels AUROC $\uparrow$       |                               |                                                             | Images AUROC $\uparrow$       |                               |                                                             |
|--------------|-----------|-------------------------------|-------------------------------|-------------------------------------------------------------|-------------------------------|-------------------------------|-------------------------------------------------------------|
|              |           | $\mathcal{S}_I^{\mathcal{F}}$ | $\mathcal{S}_R^{\mathcal{F}}$ | $\mathcal{S}_I^{\mathcal{F}} + \mathcal{S}_R^{\mathcal{F}}$ | $\mathcal{S}_I^{\mathcal{F}}$ | $\mathcal{S}_R^{\mathcal{F}}$ | $\mathcal{S}_I^{\mathcal{F}} + \mathcal{S}_R^{\mathcal{F}}$ |
| Real         | Valve     | 99.3                          | 99.3                          | 99.3                                                        | 95.7                          | 99.7                          | 98.8                                                        |
|              | Tube      | 99.6                          | 99.6                          | 99.6                                                        | 93.1                          | 90.0                          | 94.7                                                        |
|              | Cup       | 99.6                          | 99.5                          | 99.5                                                        | 96.1                          | 93.8                          | 92.5                                                        |
|              | USB       | 99.5                          | 99.4                          | 99.4                                                        | 51.1                          | 53.6                          | 55.8                                                        |
|              | Joint     | 99.8                          | 99.8                          | 99.7                                                        | 100.0                         | 99.6                          | 100.0                                                       |
|              | PaperCup  | 99.1                          | 98.9                          | 99.1                                                        | 91.8                          | 89.9                          | 91.1                                                        |
|              | Lighter   | 99.9                          | 99.8                          | 99.8                                                        | 99.5                          | 98.7                          | 99.9                                                        |
|              | Cube      | 99.4                          | 99.2                          | 99.3                                                        | 90.0                          | 86.7                          | 87.7                                                        |
|              | Lamp      | 96.1                          | 94.9                          | 95.8                                                        | 95.4                          | 88.8                          | 95.4                                                        |
|              | Bolt      | 98.9                          | 98.8                          | 98.9                                                        | 100.0                         | 96.6                          | 99.1                                                        |
|              | Filter    | 99.9                          | 99.5                          | 99.9                                                        | 98.8                          | 82.5                          | 97.0                                                        |
|              | Wand      | 99.6                          | 99.5                          | 99.6                                                        | 93.8                          | 92.9                          | 94.4                                                        |
|              | Wheel     | 96.8                          | 96.8                          | 97.1                                                        | 81.1                          | 98.3                          | 94.8                                                        |
|              | Bearing   | 99.7                          | 99.7                          | 99.7                                                        | 96.4                          | 98.6                          | 95.6                                                        |
| Synt         | Axletree  | 99.5                          | 99.6                          | 99.5                                                        | 93.2                          | 95.1                          | 95.3                                                        |
|              | Box       | 99.3                          | 99.5                          | 99.3                                                        | 95.5                          | 94.0                          | 95.9                                                        |
|              | Can       | 99.4                          | 99.5                          | 99.4                                                        | 99.9                          | 97.7                          | 99.9                                                        |
|              | Chain     | 99.1                          | 99.4                          | 99.1                                                        | 99.8                          | 99.5                          | 100.0                                                       |
|              | Gear      | 97.1                          | 97.9                          | 97.1                                                        | 99.9                          | 98.1                          | 99.7                                                        |
|              | Keyring   | 99.6                          | 99.7                          | 99.5                                                        | 100.0                         | 100.0                         | 100.0                                                       |
|              | Motor     | 99.1                          | 99.0                          | 99.0                                                        | 85.5                          | 97.8                          | 98.4                                                        |
|              | Parts     | 99.6                          | 99.6                          | 99.5                                                        | 99.3                          | 97.8                          | 99.4                                                        |
|              | Picker    | 99.5                          | 99.5                          | 99.4                                                        | 98.4                          | 96.3                          | 99.4                                                        |
|              | Section   | 99.3                          | 99.5                          | 99.2                                                        | 99.2                          | 98.2                          | 99.5                                                        |
|              | Shaft     | 99.5                          | 99.8                          | 99.6                                                        | 99.5                          | 100.0                         | 100.0                                                       |
|              | Spray_can | 99.4                          | 99.5                          | 99.3                                                        | 100.0                         | 99.9                          | 100.0                                                       |
|              | Spring    | 99.6                          | 99.5                          | 99.5                                                        | 93.5                          | 87.9                          | 92.4                                                        |
|              | Sprockets | 99.6                          | 99.5                          | 99.6                                                        | 99.8                          | 88.4                          | 99.2                                                        |
|              | Amphora   | 96.5                          | 98.4                          | 97.5                                                        | 72.6                          | 82.6                          | 79.5                                                        |
|              | Teapot    | 97.3                          | 98.0                          | 97.6                                                        | 83.1                          | 86.7                          | 87.8                                                        |
| MEAN of $CL$ |           | 99.20                         | 99.20                         | 99.14                                                       | 94.84                         | 93.67                         | 95.59                                                       |
| MEAN of $IL$ |           | 98.30                         | 98.65                         | 98.57                                                       | 87.63                         | 90.27                         | 91.52                                                       |
| MEAN of All  |           | 99.02                         | 99.09                         | 99.03                                                       | 93.40                         | 92.99                         | 94.77                                                       |

Table 6. **Ablation** – on loss components for anomaly detection. Our selected configuration ( $\mathcal{S}_I^{\mathcal{F}} + \mathcal{S}_R^{\mathcal{F}}$ ) yields the best results overall.  $\mathcal{S}_I^{\mathcal{F}}$  represents the color feature, while  $\mathcal{S}_R^{\mathcal{F}}$  denotes the reflectance feature.
